# Supplementary material for: Physico-Chemical Properties and Phase Behavior of the Ionic Liquid-β-Cyclodextrin Complexes
Source: Int J Mol Sci. 2013 Aug 13;14(8):16638–55. doi: 10.3390/ijms140816638 (PMC3759929; doi:10.3390/ijms140816638)

## Supplementary Information

**Table S1.** Experimental Solid-Liquid Phase Equilibria of Binary Systems {IL (1) +  $\beta$ -CD (2)}.

| $x_1$      | $T/K$  | $x_1$  | $T/K$  |
|------------|--------|--------|--------|
| [EMIM][Cl] |        |        |        |
| 0.8065     | 403.15 | 0.9709 | 326.15 |
| 0.8547     | 373.15 | 0.9804 | 337.15 |
| 0.9009     | 328.15 | 0.9901 | 348.15 |
| 0.9524     | 298.15 | 1.0000 | 358.15 |
| 0.9615     | 308.15 |        |        |
| [EMIM][Br] |        |        |        |
| 0.8547     | 321.15 | 0.9709 | 305.15 |
| 0.9009     | 313.15 | 0.9804 | 324.15 |
| 0.9524     | 297.15 | 0.9901 | 341.15 |
| 0.9615     | 293.15 | 1.0000 | 350.15 |
| [BMIM][Cl] |        |        |        |
| 0.8065     | 423.15 | 0.9615 | 338.15 |
| 0.8547     | 413.15 | 0.9709 | 318.15 |
| 0.9009     | 373.15 | 0.9804 | 303.15 |
| 0.9242     | 365.15 | 0.9901 | 321.15 |
| 0.9524     | 348.15 | 1.0000 | 338.15 |

**Table S2.** Experimental Eutectic Points of Binary Systems {IL (1) +  $\beta$ -CD (2)}.

| IL         | $x_{1,e}$ | $T_{1,e}/K$ |
|------------|-----------|-------------|
| [EMIM][Cl] | 0.940     | 275.0       |
| [EMIM][Br] | 0.961     | 293.1       |
| [BMIM][Cl] | 0.978     | 302.5       |

### The IR Spectroscopy

**Table S3.** Infrared spectroscopic data for the aromatic stretching region (3200–3000  $\text{cm}^{-1}$ ), corresponding with C-H stretching frequencies in the imidazolium cation.

| IL                       | $\nu[\text{C}(5)\text{--H}]$ | $\nu[\text{C}(4)\text{--H}]$ | $\nu[\text{C}(2)\text{--H}]$ |
|--------------------------|------------------------------|------------------------------|------------------------------|
| [EMIM][Cl]               | 3149 m                       | 3092 m                       | 3060 l                       |
| [EMIM][Cl] + $\beta$ -CD | 3150 m                       | 3095 m                       | 3085 m                       |
| [EMIM][Br]               | 3146 m                       | 3072 m                       | 3018 l                       |
| [EMIM][Br] + $\beta$ -CD | 3148 m                       | 3088 m                       | 3042 s                       |
| [BMIM][Cl]               | 3141 l                       | 3064 m                       | 3010 l                       |
| [BMIM][Cl] + $\beta$ -CD | 3146 l                       | 3086 m                       | 3049 s                       |

**Figure S1.** IR spectra of  $\beta$ -CD.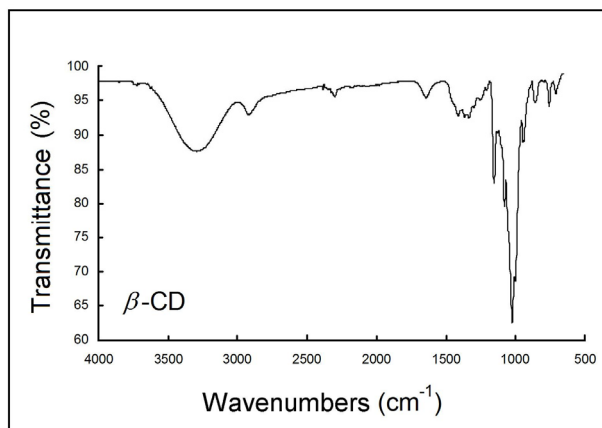**Figure S2.** IR spectra of pure ILs and their mixtures with  $\beta$ -CD: (a) [EMIM][Cl]; (b) [EMIM][Cl] +  $\beta$ -CD; (c) [EMIM][Br]; (d) [EMIM][Br] +  $\beta$ -CD; (e) [BMIM][Cl]; (f) [BMIM][Cl] +  $\beta$ -CD; (g) [BMPyr][Cl]; (h) [BMPyr][Cl] +  $\beta$ -CD.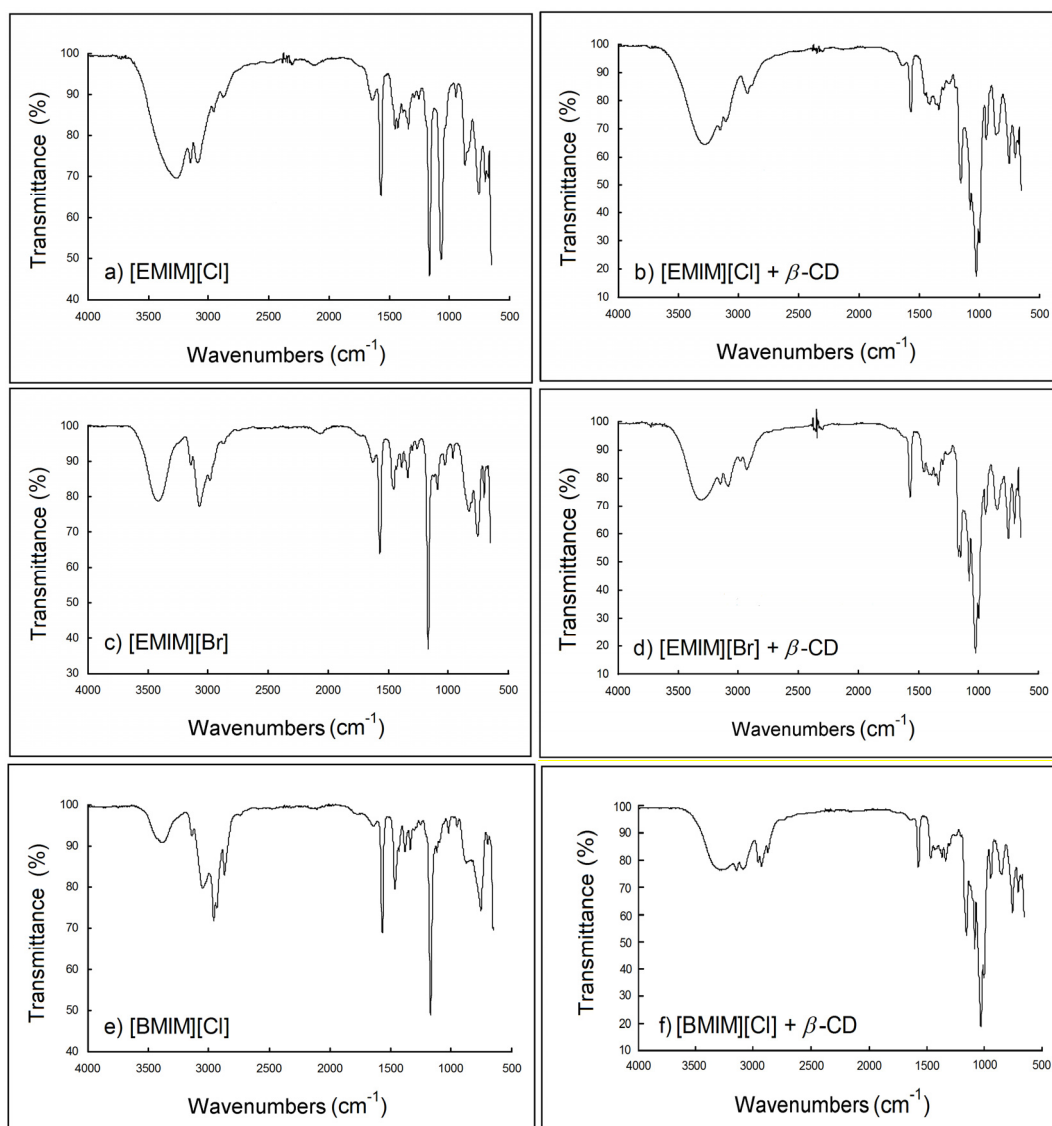

Figure S2. Cont.

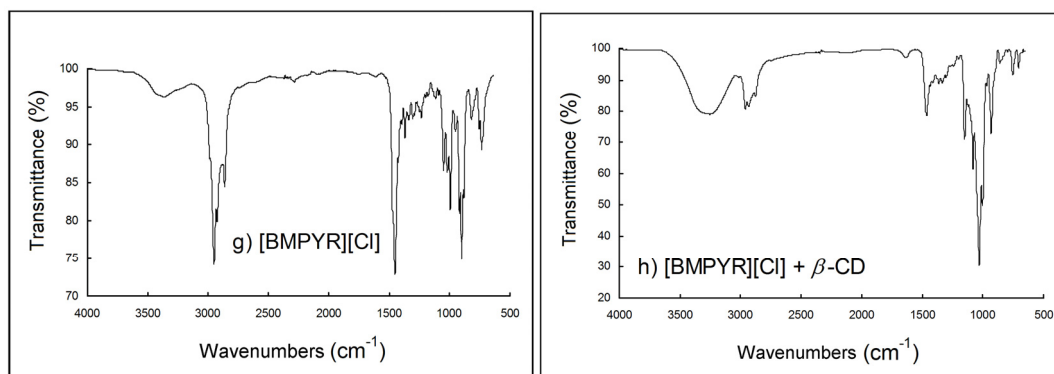

**Figure S3.** Plot of  $\ln(\gamma_{13}^{\infty})$  versus  $1/T$  for methanol in different ionic liquids and their mixtures with  $\beta$ -CD: (a) [BMPYR][Cl]; (b) [OMIM][NTf<sub>2</sub>].

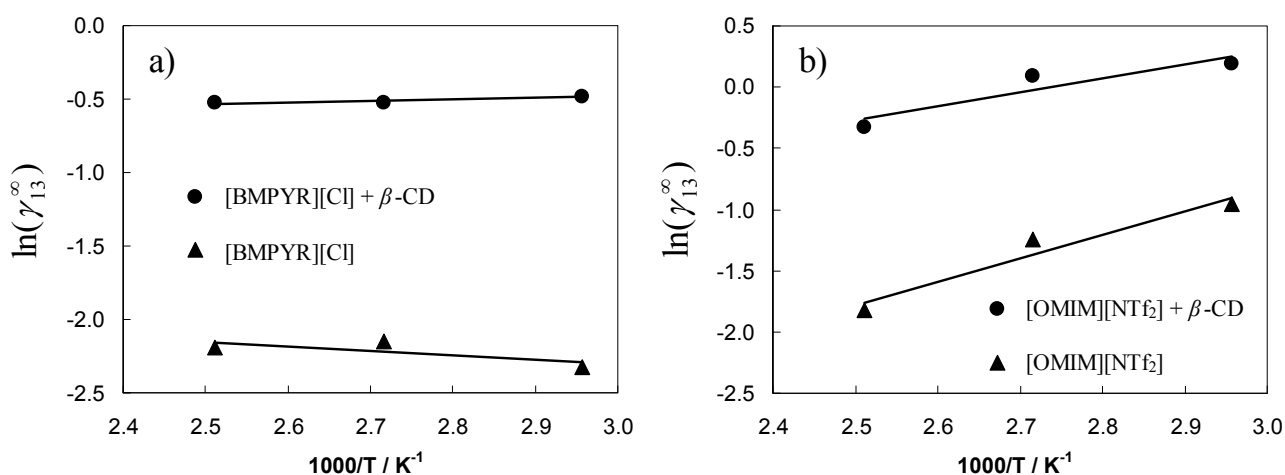

**Figure S4.** Plot of  $\ln(\gamma_{13}^{\infty})$  versus  $1/T$  for solutes in different ionic liquids and their mixtures with  $\beta$ -CD: (a) water + [BMPYR][Cl]; (b) *o*-xylene + [OMIM][NTf<sub>2</sub>].

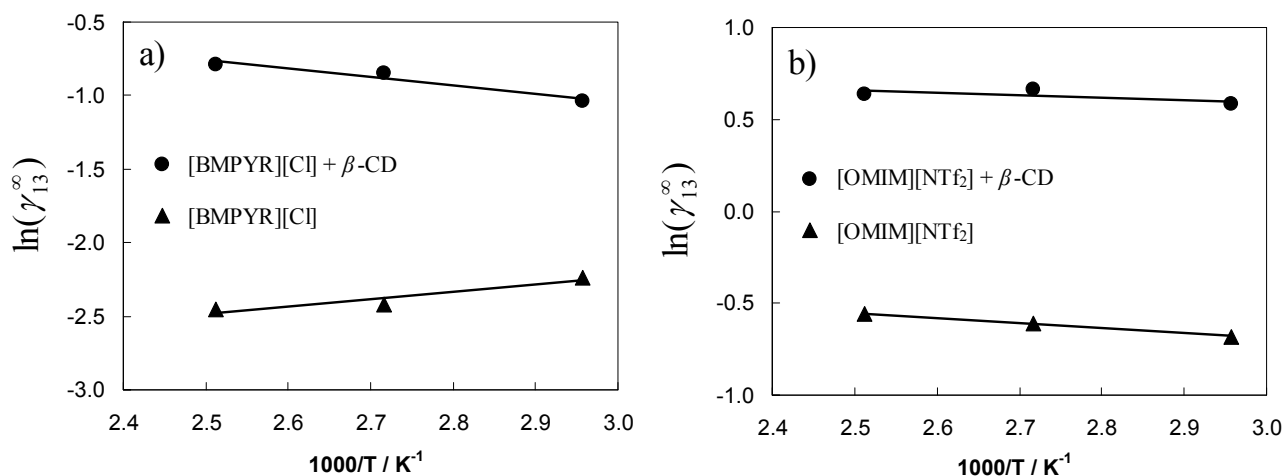

Supplement: Supplementary file 1 [file ijms-14-16638-s001.pdf]
